# Supplementary material for: Multigenetic Pharmacogenomics–Guided Treatment vs Treatment As Usual Among Hospitalized Men With Schizophrenia: A Randomized Clinical Trial
Source: PubMed Central journal article supplement (PMC10559185; doi:10.1001/jamanetworkopen.2023.35518), 2023-10-06
Supplement: jamanetwopen-e2335518-s001.pdf [file jamanetwopen-e2335518-s001.pdf]

1       **Randomized controlled trials of the therapeutic efficacy and safety of**  
2       **individualized pharmacogenomics-guided treatment in patients with**  
3       **schizophrenia and major depressive disorder**

4       **1. Abstract**

5       Schizophrenia and major depressive disorder (MDD) are common mental diseases  
6       with a heavy disease burden, and poor compliance of patients is a major problem in  
7       the clinical treatment. The objective of this study was to investigate the genetic  
8       mechanism of individualized differences in the response to antipsychotic and  
9       antidepressant drugs in the Han Chinese population. We plan to enroll 200 patients  
10      with schizophrenia and 200 patients with MDD, and randomly assign them to Guided  
11      and Unguided treatment groups. Saliva samples will be collected from oral swabs and  
12      DNA will be extracted using a commercial pharmacogenomics (PGx) testing kit from  
13      Conlight Medical Inc., Shanghai, China. After testing, the PGx reports will be provided  
14      to clinicians of the Guided group to guide drug selection, while PGx reports of the  
15      Unguided group will be kept until the end of the study. The Unguided group receives  
16      treatment-as-usual (TAU). Treatment efficacy and security will be compared between  
17      the Guided and Unguided groups, using standardized/quantified clinical records,  
18      efficacy information, and genetic information.

19  
20      **2. Background**

21      Individualized medicine takes into consideration of patient's sex, age, weight,  
22      physiological and pathological characteristics, genetic factors, and current drug usage,  
23      to develop a safe, reasonable, effective, and cost-efficient tailored treatment regimen.  
24      A large number of research show that genetic factors are important factors influencing  
25      individual differences in drug response, that is, patients' drug response-related gene  
26      affect individual therapeutic effects. According to the World Health Organization  
27      (WHO), a third of all deaths worldwide are due to inappropriate drug use rather than  
28      natural diseases themselves. There are about 50 million inpatients in China every  
29      year, of which at least 2.5 million are related to adverse drug reactions, and about  
30      200,000 people die from them, becoming the fourth leading cause of death after  
31      cancer and cardiovascular disease. Safe drug use has become a global public health  
32      problem, and it is imperative and urgent to carry out individualized drug therapy.

33      On May 6, 2018, the Mayo Clinic and the National Institutes of Health (NIH)  
34      launched the "All of Us Research Program". European and American countries have  
35      developed commercial detection products such as Genesight, Genecepet, and  
36      Neuropharmagen for guiding drug therapy. These commercial PGx testing products  
37      can increase the response rate of antidepressants and antipsychotics by 2.26 times  
38      and the remission rate by 2.5 times; increase compliance by 6.3%, significantly  
39      improved the quality of life of patients, reduced the incidence of adverse drug  
40      reactions, and reduced the cost of treatment of \$3,764 per person per year. Some of  
41      these testing have been included in the European and American national health  
42      insurance directory.

43      Research on genomics, personalized medicine, and common psychiatric  
44      diseases has made rapid progress recently. At present, international neuroscience  
45      research is developing rapidly. Global consortium for genomic research on mental  
46      disorders, including the PGC, BROAD, and other research consortiums or institutions,  
47      has shown a partial monopoly, which is difficult for domestic academic institutions and  
48      other international institutions to compete with. The large global cohort of  
49      schizophrenia genomics and pharmacogenomics studies has identified a large  
50      number of genetic variants associated with individual differences in disease  
51      pathogenesis, drug efficacy, and adverse reactions. With the development of  
52      pharmacogenomics in clinical research, the first gene testing platform has been  
53      approved in the United States to detect CYP2D6 and CYP2C19, which makes up for  
54      the shortage of individualized drug administration only based on blood drug

55 concentration in the past. Therefore, clinicians can optimize the drug administration  
56 plan according to the individual genetic characteristics of patients, and truly achieve  
57 personalized medication, to bring efficient, safe, and cost-efficient treatment for  
58 patients with mental illness. In addition, functional studies on schizophrenia  
59 susceptibility genes are in progress. The regulation mechanism of the signaling  
60 pathway of these genes remains to be explored. Elucidating the biological functions of  
61 these genetic variants will help to find biomarkers for the prevention, diagnosis, drug  
62 therapy, and prognosis of mental diseases and the target of drug therapy.

63 According to the literature, about 66.5% of patients with schizophrenia did not  
64 achieve clinical response after taking antipsychotics (PANSS reduction rate <50%);  
65 About 66.9% of the patients did not achieve clinical remission. Antipsychotics have a  
66 30-50% discontinuation rate due to poor efficacy. Meta-analyses of clinical studies  
67 over the past 30 years have shown that the clinical cure rate of antidepressants is  
68 30-40%. Studies have shown that genetic factors account for approximately 42-50%  
69 of individual differences in response and adverse reactions to antipsychotics and  
70 antidepressants, providing a basis for individualized medication for psychiatric  
71 disorders.

72 There are a variety of antipsychotics and antidepressants. Proper selection of  
73 drugs, dose, treatment course, and rational combination of these drugs can achieve  
74 the best efficacy and the least adverse reactions. However, the scientific research on  
75 how to guide the proper use of these drugs is far behind the actual clinical needs.  
76 Therefore, in a sense, how to choose the appropriate drug treatment regimen for  
77 patients is a clinical skill. In recent years, many domestic companies have launched  
78 gene testing projects, starting from the gene level to design individualized drug  
79 therapy, and finally, realize individualized drug use from "treating the disease" to  
80 "treating the person". The research on the susceptibility genes of schizophrenia and  
81 MDD in the Chinese population still needs to be improved. Finding the susceptibility  
82 genes of schizophrenia and MDD in the Chinese population and verifying their  
83 correlation with susceptibility genes will help guide the development of targeted drugs  
84 and provide an important basis for the individualized treatment of schizophrenia and  
85 MDD.

86

### 87 **3. Objective and relevance**

88 The purpose of this study is to explore the mechanisms of the inheritance of individual  
89 differences in response to antipsychotics and antidepressants. We plan to enroll 200  
90 cases of schizophrenia and 200 cases of MDD in China and use the PGx testing from  
91 Conlight Medical that was approved by State Food and Drug Administration (SFDA).  
92 Participants will be randomly assigned to accept PGx-guided treatment or TAU.

93 Using standardized/quantified clinical cases, efficacy information, and genetic  
94 studies, the relationship between the efficacy of antipsychotics and the genes/loci  
95 associated with response or adverse reactions in Han Chinese was further examined.

96

### 97 **4. Research procedure**

#### 98 **4.1 Specific Objectives**

99 Based on the pharmacogenomics studies of schizophrenia and MDD in the Chinese  
100 Han population and internationally, a randomized controlled trial is designed to  
101 explore the efficacy and safety of individualized PGx-guided treatment of  
102 schizophrenia and MDD, compared with current conventional treatment. To further  
103 identify the genes/loci associated with the efficacy and adverse reactions of  
104 antipsychotics and antidepressants in Han Chinese and their potential functions, and  
105 provide clues for the individualized treatment of schizophrenia and MDD.

106

#### 107 **4.2 A randomized controlled trial of the therapeutic efficacy and safety of 108 individualized pharmacogenomics-guided treatment in patients with**

109 **schizophrenia**

110 **4.2.1 Study design**

111 A 12-week, two-center, patient- and rater-blinded, parallel, randomized, controlled trial  
112 evaluating the therapeutic effects of individualized PGx-guided treatment in patients  
113 with SCH, with a comparison to a TAU group. The total number of participants will be  
114 200 (100 per group). Participants will be assessed at baseline, the end of week 2, 6,  
115 and 12.

116 **4.2.2 Participant recruitment**

117 **(1) Sample size:** 200

118 **(2) Inclusion criteria:** Inpatient, Han nationality, gender unlimited, 18-60 years old;  
119 can provide written informed consent signed by patient or guardian; diagnosed with  
120 schizophrenia by 2 attending psychiatrists according to the *Diagnostic and Statistical*  
121 *Manual of Mental Disorders, Fourth Edition (DSM-IV)* criteria for schizophrenia, have  
122 a total score  $\geq 60$  of the Positive and Negative Syndrome Scale (PANSS) at baseline.  
123 The patient should have a fixed residence, be able to complete a 12-week follow-up of  
124 antipsychotic therapy, and agree to cooperate with the investigator to complete the  
125 follow-up treatment on time.

126 **(3) Exclusion criteria:** Suffering from severe physical diseases (such as metabolic  
127 diseases, kidney diseases, liver diseases, thyroid diseases, etc.) or organic brain  
128 diseases, which can refer to having a deviation more than twice from the normal value  
129 of laboratory tests, or refer to the research doctor's opinion; a history of loss of  
130 consciousness for more than 5 minutes; a history of alcohol or substance  
131 abuse/dependence within the past 1 year; electroconvulsive therapy in the past six  
132 months; regular use of addictive drugs within one month; presence of other mental  
133 disorders (personality disorders and mental retardation) that significantly affect the  
134 patient's current mental state; women who is pregnant or breastfeeding, or who plans  
135 to become pregnant; other situation that researchers consider noncompliant with the  
136 research.

137 **(4) Withdrawal and termination criteria:** Presence of any of the above exclusion  
138 criteria, any severe adverse events, or upon patient request.

139 **4.2.3 Randomization and masking**

140 Patients enrolled will be randomly assigned to the individualized PGx-guided  
141 treatment group or the TAU group in a 1:1 ratio using a pre-planned randomization list  
142 containing 200 random numbers. According to the order in which they were enrolled,  
143 each patient will be assigned a random number, with an odd number standing for the  
144 guided group, and an even number for TAU. The table of random numbers is  
145 generated by authorized personnel from the Evidence-Based Medicine Centre of  
146 Peking University Sixth Hospital, using the *Formula* function of Excel,  
147  $=INT(200 * RAND() + 1)$ . Raters are blinded to the study arm. Patients are blinded to the  
148 study arm and their PGx report until the end of the trial. Clinicians who take care of  
149 patients in the guided group have an access to the PGx report to guide drug selection.

150 **4.2.4 Interventions**

151 Participants first complete all baseline assessments and laboratory tests. Within the  
152 first week, all patients receive a low dose of risperidone  $\leq 2$  mg/d (an equivalent dose  
153 conversion of other antipsychotics), and benzodiazepines are allowed to use as  
154 treatments for agitation or insomnia if required. At the end of the first week, when PGx  
155 reports are available, patients in the guided group receive drug therapy according to  
156 the reports, and patients in the TAU group receive drug therapy according to the  
157 clinicians' experience. Participants complete 2-, 6- and 12-weeks follow-up, which  
158 include comprehensive physical examination, laboratory tests (blood routine test,  
159 blood biochemistry test), auxiliary tests (electrocardiogram, electroencephalogram),  
160 clinical scale evaluation (PANSS, CGI), etc.

161 **4.2.5 Measurement**

162 The primary efficacy endpoint of this trial was the percentage PANSS change from the  
163 baseline to week 6. Percentage PANSS change is calculated as:

164  $\Delta P = (\text{PANSS}_0 - \text{PANSS}_6) \times 100\% / (\text{PANSS}_0 - 30)$   
165 PANSS<sub>0</sub> indicates the total PANSS score at baseline, and PANSS<sub>6</sub> indicates the  
166 total PANSS score at the end of week 6.  
167 The secondary endpoint was response or remission rates at each time point.  
168 Early response was defined as a percentage PANSS change of  $\geq 20\%$  at week 2,  
169 response was defined as a percentage PANSS change of  $\geq 50\%$ , and symptomatic  
170 remission was defined as a PANSS score of  $\leq 3$  on items P1, P2, P3, N1, N4, N6, G5,  
171 and G9 at week 12.  
172 Use the clinical global impression (CGI) Scale as supplemental evaluation of  
173 clinical efficacy.  
174

### 175 **4.3 A randomized controlled trial of the therapeutic efficacy and safety of** 176 **individualized pharmacogenomics-guided treatment in patients with MDD**

#### 177 **4.3.1 Study design**

178 An 8-week, two-center, patient- and rater-blinded, parallel, randomized, controlled trial  
179 evaluating the therapeutic effects of individualized PGx-guided treatment in patients  
180 with MDD, with a comparison to a TAU group. The total number of participants will be  
181 200 (100 per group). Participants will be assessed at baseline, the end of week 4 and  
182 8.

#### 183 **4.3.2 Participant recruitment**

184 **(1) Sample size:** 200

185 **(2) Inclusion criteria:** Han nationality, gender unlimited, 18-55 years old; can provide  
186 written informed consent signed by patient or guardian; diagnosed with MDD by 2  
187 attending psychiatrists according to the *Diagnostic and Statistical Manual of Mental*  
188 *Disorders, Fourth Edition (DSM-IV)* criteria for MDD, have a total score  $\geq 18$  of the  
189 17-item Hamilton Depression Scale (HAMD-17) at baseline; require oral medication  
190 treatment. The patient should have a fixed residence, be able to complete an 8-week  
191 follow-up of antidepressants therapy, and agree to cooperate with the investigator to  
192 complete the follow-up treatment on time.

193 **(3) Exclusion criteria:** Diagnosed with other mental disorders according to DSM-IV  
194 criteria, were pregnant or lactating, regularly used addictive drugs for nearly one  
195 month, had significant risk for suicide and severe or unstable physical diseases, had  
196 experienced more than 5 minutes of loss of consciousness or had received  
197 electroconvulsive therapy in the past six months.

198 **(4) Withdrawal and termination criteria:** Presence of any of the above exclusion  
199 criteria, any severe adverse events, or upon patient request.

#### 200 **4.3.3 Randomization and masking**

201 Patients enrolled will be randomly assigned to the individualized PGx-guided  
202 treatment group or the TAU group in a 1:1 ratio using a pre-planned randomization list  
203 containing 200 random numbers. According to the order in which they were enrolled,  
204 each patient will be assigned a random number, with an odd number standing for the  
205 guided group, and an even number for TAU. The table of random numbers is  
206 generated by authorized personnel from the Evidence-Based Medicine Centre of  
207 Peking University Sixth Hospital, using the *Formula* function of Excel,  
208  $=\text{INT}(200*\text{RAND}()+1)$ . Raters are blinded to the study arm. Patients are blinded to the  
209 study arm and their PGx report until the end of the trial. Clinicians who take care of  
210 patients in the guided group have an access to the PGx report to guide drug selection.

#### 211 **4.3.4 Interventions**

212 Participants first complete all baseline assessments and laboratory tests. Within the  
213 first week, all patients receive a low dose of escitalopram ( $\leq 10$  mg/d) or an equivalent  
214 dose conversion of other antidepressants, and benzodiazepines are allowed to use as  
215 treatments for agitation or insomnia if required. At the end of the first week, when PGx  
216 reports are available, patients in the guided group receive drug therapy according to  
217 the reports, and patients in the TAU group receive drug therapy according to the  
218 clinicians' experience. Participants complete 4- and 8-weeks follow-up, which include

219 comprehensive physical examination, laboratory tests (blood routine test, blood  
220 biochemistry test), auxiliary tests (electrocardiogram, electroencephalogram), clinical  
221 scale evaluation (HAMD-17, HAMA), etc.

#### 222 **4.3.5 Measurement**

223 The primary efficacy endpoint of this trial was the percentage HAMD change from the  
224 baseline to week 8. Percentage HAMD change is calculated as:

$$\text{HAMD percentage change} = 100\% * \frac{\text{Baseline Score} - \text{Follow up Score}}{\text{Baseline Score}}$$

225 The secondary endpoint was response or remission rates at each time point, with  
226 response defined as a  $\geq 50\%$  reduction in HAMD-17 scores and remission defined as  
227 HAMD-17 scores  $\leq 7$ .

228

#### 229 **5. Genetic testing**

230 Using matrix-assisted laser desorption-ionization time of flight mass spectrometry  
231 (MALDI-TOF MS) gene analysis system. PGx testing will be carried out by Conlight  
232 Medical.

233 Antipsychotic related genes are as follows: *ABCB1*, *ANKK1*, *COMT*, *CYP1A2*,  
234 *CYP2D6*, *CYP3A4*, *DRD2*, *EPM2A*, *GNB3*, *HTR1A*, *HTR2A*, *HTR2C*, *MC4R*, *RGS4*,  
235 *SH2B1*, *SLC6A4*, etc

236 Antidepressant related genes are as follows: *CYP2C19*, *CYP2D6*, *CYP1A2*,  
237 *CYP2B6*, *ABCB1*, *SLC6A4*, *HTR1A*, *HTR2A*, *FKBP5*, etc.

238

#### 239 **6. Statistical analysis**

240 The main outcome analyses will be conducted according to the “intent-to-treat”  
241 principle. The primary endpoint will be evaluated by a mixed model for repeated  
242 measures (MMRM), with the assumption that data are missing at random. The  
243 latter assumption will be tested. MMRM will be analyzed with treatment group, study  
244 center, time point of assessment as a categorical variable, baseline PANSS/HAMD-17  
245 sum score, and time  $\times$  treatment group interaction included in the model as fixed  
246 effects, while patient-specific effects enter the model as a random effect. Other  
247 potentials will also be included in the model according to the data distribution. An  
248 unstructured covariance matrix for the residuals will be used. The analyses will be  
249 supplemented by cross-sectional comparisons. Effect sizes will be calculated with  
250 Cohen’s *d*. Statistical significance was defined at an alpha level of 0.05 by two-tailed.

251

#### 252 **7. Data Confidentiality**

253 All the work described in this protocol will be carried out in China, and all specimens  
254 collected for this study will be destroyed after analysis. The study data will be stored  
255 at Peking University Sixth Hospital. The study does not involve the export of human  
256 genetic resources/information.

257 All the samples and data collected in this project will be used for long-term  
258 research in our laboratory, except for the oral pharyngeal subsamples for one-time  
259 detection. In accordance with the legal requirements, we strictly keep the  
260 confidentiality of participants’ research records, unless at the request of law. The  
261 participant’s name, address, telephone, or any information that can directly identify  
262 their identity will not be leaked to the team. Cooperation units that participate in this  
263 study have no access to the biological samples and genetic information of the original  
264 data. When information and data from this study are presented at scientific meetings  
265 or in scientific journals, each participant will be identified by a unique number, and  
266 their identity will not be disclosed. Encoding information will be kept properly.
